# Supplementary material for: IMEX_SfloW2D v2: a depth-averaged numerical flow model for volcanic gas–particle flows over complex topographies and water
Source: Copernicus journal article supplement (doi:10.5194/gmd-16-6309-2023), 2023-11-07
Supplement: Supplementary file 1 [file gmd-16-6309-2023-supplement.zip]

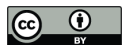

*Supplement of*

## **IMEX\_SfloW2D v2: a depth-averaged numerical flow model for volcanic gas–particle flows over complex topographies and water**

**Mattia de' Michieli Vitturi et al.**

*Correspondence to:* Mattia de' Michieli Vitturi ([mattia.demichielivitturi@ingv.it](mailto:mattia.demichielivitturi@ingv.it))

- [gmd-16-6309-2023-supplement-title-page.pdf](#)
- [FLOW\\_MODEL\\_SUPP\\_MATERIALS.pdf](#)
- [Supplementary\\_video.mp4](#)

The copyright of individual parts of the supplement might differ from the article licence.
