# Supplementary material for: IMEX_SfloW2D v2: a depth-averaged numerical flow model for volcanic gas–particle flows over complex topographies and water
Source: Copernicus journal article supplement (doi:10.5194/gmd-16-6309-2023), 2023-11-07
Supplement: Supplementary file 3 [file gmd-16-6309-2023-supplement.zip]

Archive with 3 entries (3 files):
- Supplementary_video.mp4
- FLOW_MODEL_SUPP_MATERIALS.pdf
- gmd-16-6309-2023-supplement-title-page.pdf
